# Supplementary material for: Capacity-Building to Support Safer Housing through Appropriate Hurricane Strap Use
Source: Atypon-hosted journal article supplement (doi:10.1061/nhrefo.nheng-1708), 2023-05-31
Supplement: supplemental materials_nhrefo.nheng-1708_goldwyn.pdf [file supplemental%20materials_nhrefo.nheng-1708_goldwyn.pdf]

## SUPPLEMENTAL MATERIALS

*ASCE Natural Hazards Review*

# Capacity-Building to Support Safer Housing through Appropriate Hurricane Strap Use

Briar Goldwyn, Cole Velasquez, Abbie B. Liel,  
Amy Javernick-Will, and Matthew Koschmann

**DOI:** 10.1061/NHREFO.NHENG-1708

© ASCE 2023

[www.ascelibrary.org](http://www.ascelibrary.org)

1 **S1. Lecture slides from capacity-building approach**

2

University of Colorado Boulder

## Increasing wood roof safety in future hurricanes

Briar Goldwyn and Cole Velasquez

**Agenda:**

**A. Background on our project**

B. Pre-presentation interviews

C. Presentation and discussion:

1. How wood roofs are damaged in a hurricane
2. Recommendations for avoiding catastrophic damage
3. The types of hurricane straps that should be used at different connections
4. Installing hurricane straps correctly
5. What to do if hurricane straps are not available

D. Post-presentation interviews

2

3

We interviewed and surveyed over 400 builders, hardware store employees, residents, engineers, and architects across Puerto Rico to understand concerns with housing safety

60+ Interviews

~350 Surveys

**Multi-hazard perceptions of housing safety within Puerto Rico's informal construction sector**

Field observations

3

Based on builders' and residents' experiences, we analyzed the expected performance of wood and concrete housing in hurricanes and earthquakes

Field observations

Hardware store inventory

Engineering assessments & prioritized recommendations

**Wind & seismic engineering performance assessments**

4

4

We interviewed and surveyed over 400 builders, hardware store employees, residents, engineers, and architects across Puerto Rico to understand concerns with housing safety

60+ Interviews

~350 Surveys

**Multi-hazard perceptions of housing safety within Puerto Rico's informal construction sector**

Field observations

3

Based on builders' and residents' experiences, we analyzed the expected performance of wood and concrete housing in hurricanes and earthquakes

Field observations

Hardware store inventory

Engineering assessments & prioritized recommendations

**Wind & seismic engineering performance assessments**

4

5

We compared these perceptions of housing safety and structural analysis to identify several areas for technical construction capacity development

**Unsafe design and construction practices motivated by capacity limitations**, according to builders and hardware store employees

**Focus areas:**  
E.g., the use of hurricane straps to secure key roof connections

**Common structural vulnerabilities** in wood and concrete housing in hurricanes and earthquakes

5

**Now, we're working on a way to share our research findings as recommendations**

We want to interview you before and after a short training module to understand:

- If you've learned anything
- If you think these recommendations are important to share
- Challenges associated with these recommendations
- Suggestions to improve it

6

6

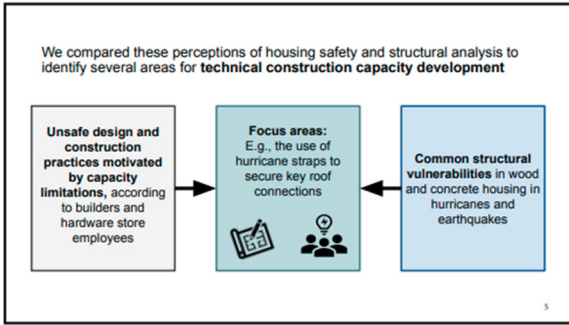

Now, we're working on a way to share our research findings as recommendations

We want to interview you before and after a short training module to understanding:

- If you've learned anything
- If you think these recommendations are important to share
- Challenges associated with these recommendations
- Suggestions to improve it

6

7

**Agenda:**

A. Background on our project

B. Pre-presentation interviews

**C. Presentation and discussion:**

1. How wood roofs are damaged in a hurricane
2. Recommendations for avoiding catastrophic damage
3. The types of hurricane straps that should be used at different connections
4. Installing hurricane straps correctly
5. What to do if hurricane straps are not available

D. Post-presentation interviews

9

To explain the importance of hurricane straps at key roof connections, let's start by discussing **how to avoid catastrophic failure**

10

8

Which connections tend to fail first in a hurricane?

(A) Conexión de la viga/armadura a la placa superior  
 (B) Conexión de la correa a la viga/armadura  
 (C) Conexión de la viga central a la viga/armadura  
 (D) Conexión del panel a la correa

11

Which connections lead to the most catastrophic failure?

(A) Conexión de la viga/armadura a la placa superior  
 (B) Conexión de la correa a la viga/armadura  
 (C) Conexión de la viga central a la viga/armadura  
 (D) Conexión del panel a la correa

12

9

In a wood roof structure, the **panels tend to be the weak link** and are torn off first **because nails secure the panels**

Source: FEMA (2018)

15

Next, other more catastrophic failures can occur like the **purlin-to-truss/rafter connections**

Source: ABC News

This can look like the panels were ripped off, but involves more structural damage to the roof

16

10

In a wood roof structure, the **panels tend to be the weak link** and are torn off first **because nails secure the panels**

Source: FEMA (2018)

15

Next, other more catastrophic failures can occur like the **purlin-to-truss/rafter connections**

Source: ABC News

This can look like the panels were ripped off, but involves more structural damage to the roof

16

11

12

Damage to this **truss/rafter-to-top plate connection** is the most catastrophic roof failure because it leads to damage of the whole roof to wall connection

Labels: Purlin to Truss Connection, Truss, Truss to Wall Connection, Purlin, Roof Panel, Wind uplift force

Grid labels: ROOF REINFORCEMENT, NO ROOF REINFORCEMENT

Source: Simpson Strong Tie

### Agenda:

- A. Background on our project
- B. Pre-presentation interviews
- C. **Presentation and discussion:**
  1. How wood roofs are damaged in a hurricane
  2. **Recommendations for avoiding catastrophic damage**
  3. **The types of hurricane straps that should be used at different connections**
  4. Installing hurricane straps correctly
  5. What to do if hurricane straps are not available
- D. Post-presentation interviews

18

13

You can **avoid costly and dangerous roof damage** but making sure that everything is anchored to the foundation with the correct fasteners

Grid labels: ROOF REINFORCEMENT, NO ROOF REINFORCEMENT

Source: FLADH

Source: Simpson Strong Tie

19

You can **avoid costly and dangerous roof damage** but making sure that everything is anchored to the foundation with the correct fasteners

*Which locations should fasteners be prioritized?*  
*Which types of fasteners should be used where?*

Grid labels: ROOF REINFORCEMENT, NO ROOF REINFORCEMENT

Source: Simpson Strong Tie

21

14

You can **avoid costly and dangerous roof damage** but making sure that everything is anchored to the foundation with the correct fasteners

Grid labels: ROOF REINFORCEMENT, NO ROOF REINFORCEMENT

Source: FLADH

Source: Simpson Strong Tie

19

You can **avoid costly and dangerous roof damage** but making sure that everything is anchored to the foundation with the correct fasteners

*Which locations should fasteners be prioritized?*  
*Which types of fasteners should be used where?*

Grid labels: ROOF REINFORCEMENT, NO ROOF REINFORCEMENT

Source: Simpson Strong Tie

21

15

**Truss/rafter-to-top plate connection** should be strengthened with **H1 straps** or **H2.5A straps**. H1 straps are not as strong as **H2.5A straps**

H1 straps:

Wind uplift force

Max uplift capacity: 480 lbs

H2.5A straps:

Wind uplift force

Max uplift Capacity: 615 lbs

23

**Truss/rafter-to-wall (top plate) connection** are commonly strengthened with the H1, H2.5A, and H10A

1 H1 Installation (H1.81Z similar)

4 H2.5A Installation (nails into both top plates)

15 H10A Installation

Source: Simpson Strong Tie

24

16

**Truss/rafter-to-top plate connection** should be strengthened with **H1 straps** or **H2.5A straps**. H1 straps are not as strong as **H2.5A straps**

H1 straps:

Wind uplift force

Max uplift capacity: 480 lbs

H2.5A straps:

Wind uplift force

Max uplift Capacity: 615 lbs

23

**Truss/rafter-to-wall (top plate) connection** are commonly strengthened with the H1, H2.5A, and H10A

1 H1 Installation (H1.81Z similar)

4 H2.5A Installation (nails into both top plates)

15 H10A Installation

Source: Simpson Strong Tie

24

At the **truss/rafter-to-top plate connection**: Do not bend the H1 strap. That strap is designed to not be bent and to include a nail at the bottom. You **CAN** bend the MTS12 strap to fit your needs as shown:

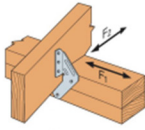

H1 strap, Source: Simpson Strong Tie

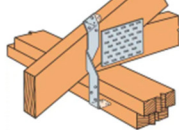

MTS12 strap, Source: Simpson Strong Tie

25

17

At the **truss/rafter-to-top plate connection**: Do not bend the H1 strap. That strap is designed to not be bent and to include a nail at the bottom. You **CAN** bend the MTS12 strap to fit your needs as shown:

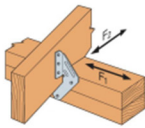

H1 strap, Source: Simpson Strong Tie

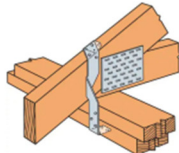

MTS12 strap, Source: Simpson Strong Tie

25

18

Then, we recommend strengthening the **purlin-to-truss/rafter connections** with: **Purlin Screws or H3 Hurricane Straps**

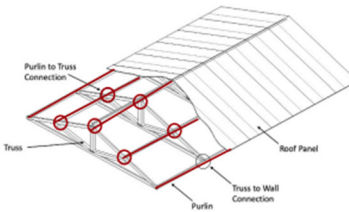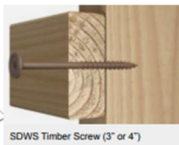

SOWS Timber Screw (3" or 4")

28

19

### Agenda:

- A. Background on our project
- B. Pre-presentation interviews
- C. **Presentation and discussion:**
  1. How wood roofs are damaged in a hurricane
  2. Recommendations for avoiding catastrophic damage
  3. The types of hurricane straps that should be used at different connections
  4. **Installing hurricane straps correctly**
  5. What to do if hurricane straps are not available
- D. Post-presentation interviews

30

20

How to read the information on hurricane straps:

| Model No. | Ga. | Fasteners (in.)   |                   |                   | DF/SP Allowable Loads |               |                                         | SPF/HF Allowable Loads |               |                                         | Code Ref. |     |            |
|-----------|-----|-------------------|-------------------|-------------------|-----------------------|---------------|-----------------------------------------|------------------------|---------------|-----------------------------------------|-----------|-----|------------|
|           |     | To Rafter/Truss   | To Plates         | To Studs          | Uplift (160)          | Lateral (160) | Uplift with 0.131" x 1 1/2" Nails (160) | Uplift (160)           | Lateral (160) | Uplift with 0.131" x 1 1/2" Nails (160) |           |     |            |
| H1        | 18  | (2) 0.131 x 1 1/4 | (4) 0.131 x 2 1/8 | ---               | 480                   | 570           | 170                                     | 455                    | 425           | 440                                     | 165       | 370 | BC, FL, LA |
| H1-RZ     | 18  | (2) 0.131 x 1 1/4 | (4) 0.131 x 2 1/8 | ---               | 540                   | 440           | 170                                     | 480                    | 465           | 380                                     | 130       | 385 | ---        |
| H2A       | 18  | (2) 0.131 x 1 1/4 | (2) 0.131 x 1 1/4 | (2) 0.131 x 1 1/4 | 525                   | 130           | 55                                      | ---                    | 495           | 130                                     | 55        | --- | BC, FL, LA |
| H2ASS     | 18  | (2) 0.131 x 1 1/4 | (2) 0.131 x 1 1/4 | (2) 0.131 x 1 1/4 | 400                   | 130           | 55                                      | 400                    | 345           | 130                                     | 55        | 345 | ---        |
| H2-SA     | 18  | (2) 0.131 x 2 1/8 | (2) 0.131 x 2 1/8 | ---               | 700                   | 110           | 110                                     | 625                    | 615           | 110                                     | 110       | 540 | BC, FL, LA |
| H2-SASS   | 18  | (2) 0.131 x 2 1/8 | (2) 0.131 x 2 1/8 | ---               | 440                   | 75            | 70                                      | 365                    | 380           | 75                                      | 70        | 370 | ---        |
| H2-ST     | 18  | (2) 0.131 x 2 1/8 | (2) 0.131 x 2 1/8 | ---               | 590                   | 135           | 145                                     | 480                    | 565           | 135                                     | 145       | 475 | ---        |
| H3        | 18  | (4) 0.131 x 2 1/8 | (4) 0.131 x 2 1/8 | ---               | 400                   | 210           | 170                                     | 400                    | 365           | 180                                     | 145       | 290 | BC, FL, LA |

The H1 strap should be installed with 6 x 1 1/2 fasteners and 4 x 2 1/2 fasteners:

**Common nails** or specified SD Screws

Types of wood:

DF/SP Allowable loads: Douglas Fir & Southern Pine

SPF/HF Allowable loads: Spruce, pine, fir, or hemlock (Soft woods)

27

How to read the information on hurricane straps:

| Model No. | Ga. | Fasteners (in.)   |                   |                   | DF/SP Allowable Loads |               |                                         | SPF/HF Allowable Loads |               |                                         | Code Ref. |     |            |
|-----------|-----|-------------------|-------------------|-------------------|-----------------------|---------------|-----------------------------------------|------------------------|---------------|-----------------------------------------|-----------|-----|------------|
|           |     | To Rafter/Truss   | To Plates         | To Studs          | Uplift (160)          | Lateral (160) | Uplift with 0.131" x 1 1/2" Nails (160) | Uplift (160)           | Lateral (160) | Uplift with 0.131" x 1 1/2" Nails (160) |           |     |            |
| H1        | 18  | (2) 0.131 x 1 1/4 | (4) 0.131 x 2 1/8 | ---               | 480                   | 570           | 190                                     | 455                    | 425           | 440                                     | 165       | 370 | BC, FL, LA |
| H1-RZ     | 18  | (2) 0.131 x 1 1/4 | (4) 0.131 x 2 1/8 | ---               | 540                   | 440           | 170                                     | 480                    | 465           | 380                                     | 130       | 385 | ---        |
| H2A       | 18  | (2) 0.131 x 1 1/4 | (2) 0.131 x 1 1/4 | (2) 0.131 x 1 1/4 | 525                   | 130           | 55                                      | ---                    | 495           | 130                                     | 55        | --- | BC, FL, LA |
| H2ASS     | 18  | (2) 0.131 x 1 1/4 | (2) 0.131 x 1 1/4 | (2) 0.131 x 1 1/4 | 400                   | 130           | 55                                      | 400                    | 345           | 130                                     | 55        | 345 | ---        |
| H2-SA     | 18  | (2) 0.131 x 2 1/8 | (2) 0.131 x 2 1/8 | ---               | 700                   | 110           | 110                                     | 625                    | 615           | 110                                     | 110       | 540 | BC, FL, LA |
| H2-SASS   | 18  | (2) 0.131 x 2 1/8 | (2) 0.131 x 2 1/8 | ---               | 440                   | 75            | 70                                      | 365                    | 380           | 75                                      | 70        | 370 | ---        |
| H2-ST     | 18  | (2) 0.131 x 2 1/8 | (2) 0.131 x 2 1/8 | ---               | 590                   | 135           | 145                                     | 480                    | 565           | 135                                     | 145       | 475 | ---        |
| H3        | 18  | (4) 0.131 x 2 1/8 | (4) 0.131 x 2 1/8 | ---               | 400                   | 210           | 170                                     | 400                    | 365           | 180                                     | 145       | 290 | BC, FL, LA |

The H1 strap should be installed with 6 x 1 1/2 fasteners and 4 x 2 1/2 fasteners:

**Common nails** or specified SD Screws

Types of wood:

DF/SP Allowable loads: Douglas Fir & Southern Pine

SPF/HF Allowable loads: Spruce, pine, fir, or hemlock (Soft woods)

27

Finally, the panels can be secured on the roof structure with more nails, nails with a wider head diameter (umbrella nails), thicker gauge roof panels, or galvalume panels

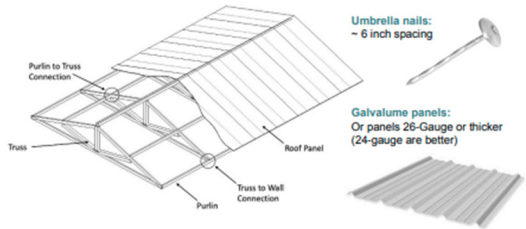

Umbrella nails:  
- 6 inch spacing

Galvalume panels:  
Or panels 26-Gauge or thicker  
(24-gauge are better)

**Generally:** Screws are designed for grip strength and nails are designed for shear loads (but it isn't always that simple, specific screws are designed with tension & shear in mind)

Screws have grip strength, withstanding down/upward pressures

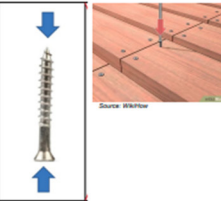

Nails have shear strength, withstanding shearing forces

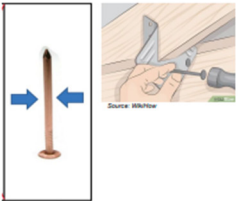

31

Nails (or *specified screws designed for shear strength*) should be used in hurricane straps

Screws will be sheared off when used in a hurricane strap

Hurricane straps are designed for nails because nails' shear strength

Source: Albany County Firemen's Association

21

A toe-nailed connection (without hurricane straps) relies on the **nails' pullout capacity**

Toe-nailed connection:

Hurricane straps are designed to have common nails or **specified SD screws** in **each opening**:

**Recommended**

All nails used: Hurricane strap will fail at/after it reaches its full potential

**Not Recommended**

Insufficient nails: Hurricane strap will fail before it reaches its full potential

22  
23

You can only bend **specified** hurricane straps. You can only bend those specific hurricane straps **once**

MTS12

MTS12 strap before and after **ONLY** bending. Source: Simpson Strong Tie
